# Supplementary material for: Fluoride and Arsenite Removal by Adsorption on La2O3-CeO2/Laterite
Source: Hindawi journal article supplement (doi:10.1155/2021/9991050), 2021-07-18
Supplement: f1 [file 9991050.f1.docx]

S1: A statistical approach of the piecewise linear regression combined with Akaike’s criteria proposed by Malash *et al.* [1] for the analysis of kinetics data.

This method allows the determination the number of linear segments and the nature of each one, which would avoid the subjective decisions that are common with the graphical method. In this approach, the experimental data could be fixed for a one-, two-, three- or four-linear-segment line in Weber’s model as follows

*Y* = *B + A*·*X* : One-linear-segment

*Y = B + A*·*X +C*·*(X–D)**SIGN(*X–D*): Two-linear-segments

*Y* = *B + A*·*X* + *C*·(*X–D*)*SIGN (*X – D*) + *E*·(*X – F*)*SIGN (*X – F*): Three-linear-segments

*Y* = *B + A*·*X* + *C·*(*X–D*)*SIGN (*X – D*) + *E*·(*X–F*)*SIGN (*X – F*) + *G*·(*X* – *H*)*SIGN(*X – H*): Four-linear-segments

where the values of *A*, *B*, *C*, *D*, *E*, *F*, *G*, and *H* are obtained by means of nonlinear regression. The Microsoft Excel “SIGN” function is described as following expression

|  | (1) |
| --- | --- |

The example for the two-linear-segment equation is as follows

|  | (2) |
| --- | --- |

The nonlinear regression determines the model’s parameters by minimizing the sum of squared deviations (*SSES*) using the Solver function in Microsoft Excel. The function for minimization is

|  | (3) |
| --- | --- |

where where *yexp* is the experimental value, and *yest* is the value calculated from the model.

*AIC* (Akaike’s information criteria) is used to compare the models. *AIC* is expressed as in Eq. 9

|  | (4) |
| --- | --- |

where *N* is the number of data points; *Np* is the number of parameters fit by the regression.

*AIC* estimates how well the data support each model. The model with the lowest *AICc* score is the most likely correct.

Reference

[1]. G.F. Malash, M.I. El-Khaiary, *Piecewise linear regression: A statistical method for the analysis of experimental adsorption data by the intraparticle-diffusion models*, Chem. Eng. J. **163**, 256–263 (2010).
